# Supplementary material for: Cdc42 prevents precocious Rho1 activation during cytokinesis in a Pak1-dependent manner
Source: Oxford University Press journal article supplement (doi:10.1242/jcs.261160), 2023-04-11
Supplement: jcs261160supp.pdf [file jcs261160supp.pdf]

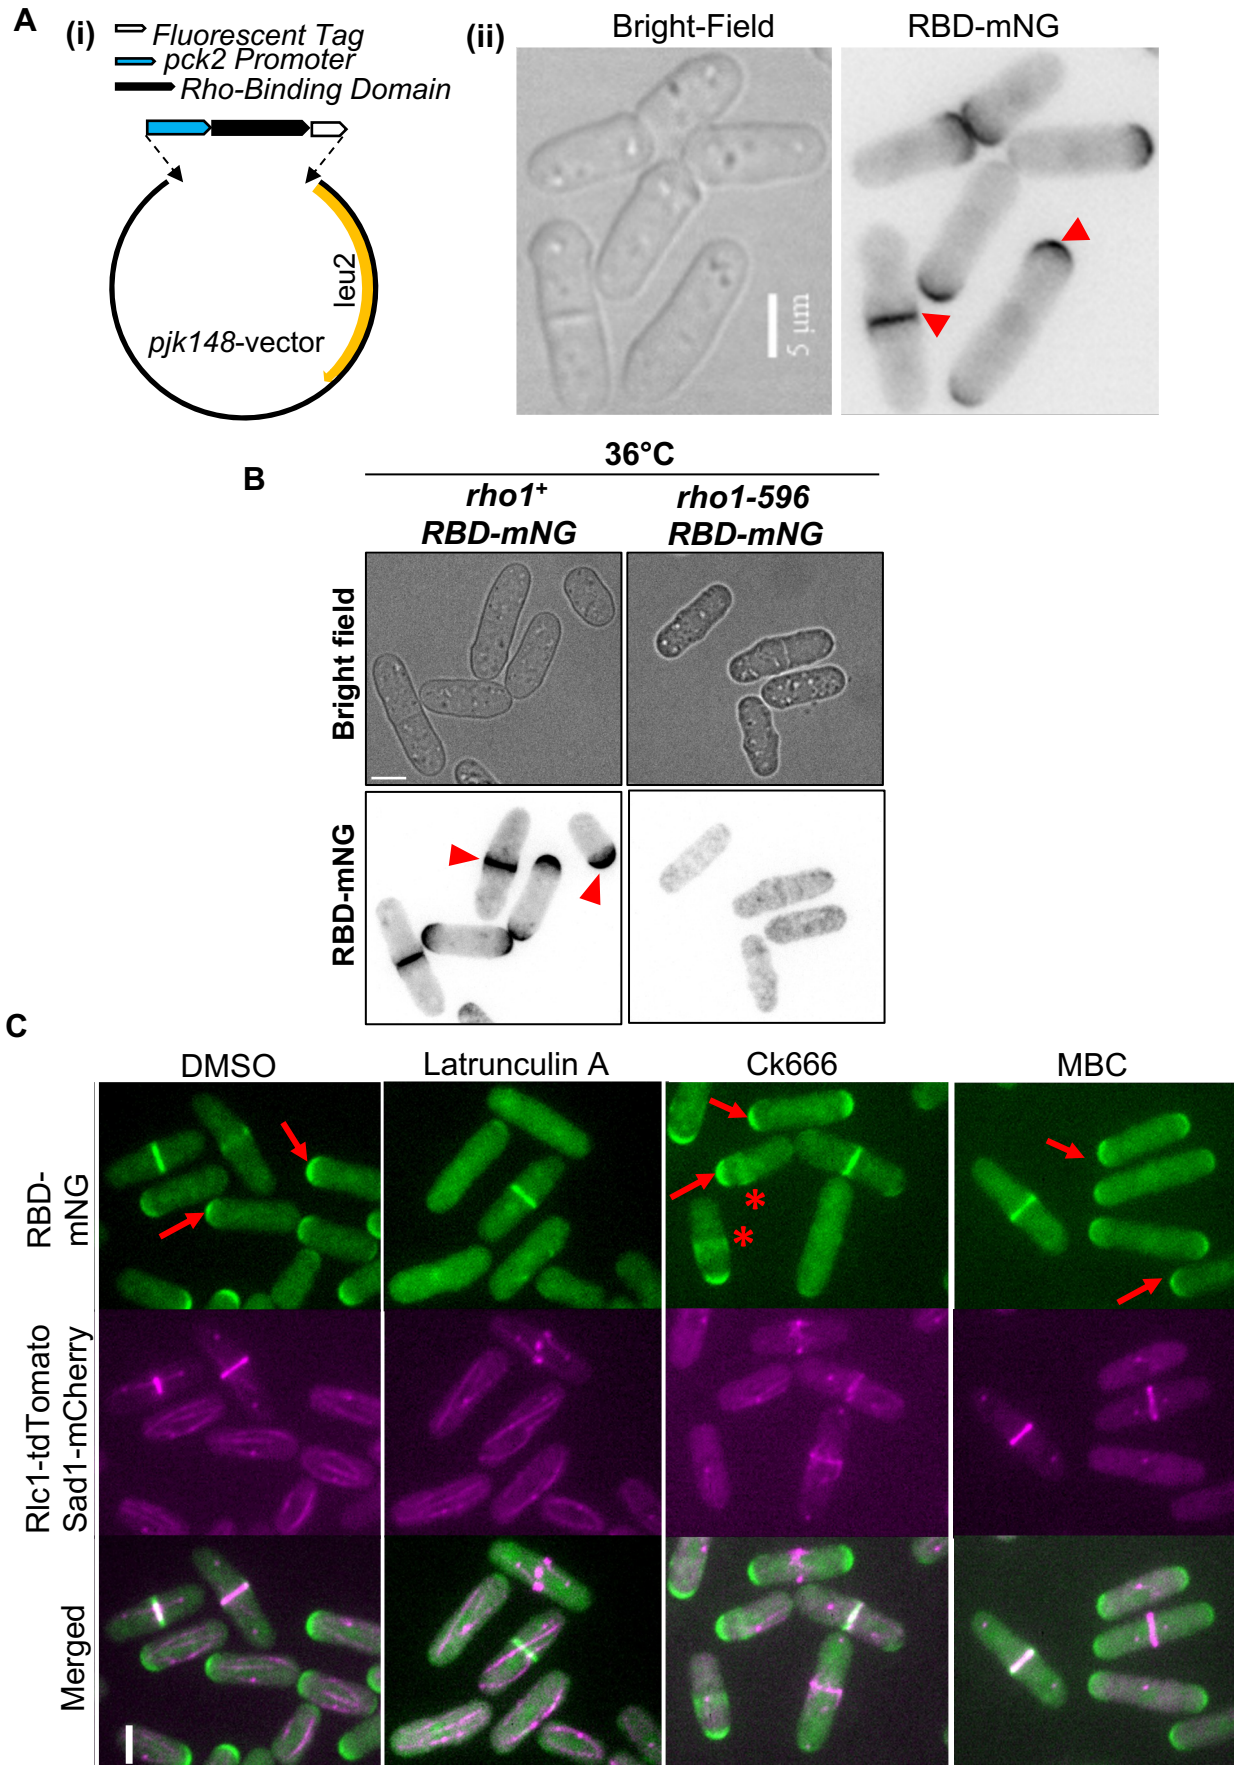

Supplemental Figure 1

**Fig. S1. The Rho-probe, (RBD-mNG) detects Rho1 activation at cell tips and the division site. A (i).** An illustration of the Rho-probe design. **(ii).** Rho-probe (RBD-mNG) detects Rho activation at the division site and cell tips in wildtype cells (red arrowheads) **B.** Rho-probe (RBD-mNG) fails to detect active Rho1 in *rho1-596* thermosensitive mutant incubated at 36°C for 2 hours. Red arrowheads point to active Rho1 (RBD-mNG) at cell division site and cell tips. **C.** Effect of cytoskeleton depolymerization on Rho probe (RBD-mNG) localization in live cells that were treated with DMSO, Latrunculin A, Ck666, and Methyl benzimidazol-2-yl-carbamate (MBC), Red arrows point to active Rho1 (RBD-mNG) at cell tips, and asterisks mark ectopic Rho1 activation [Scale Bars, 5µm].

**A Rho-probe and CRIB localization during constriction**

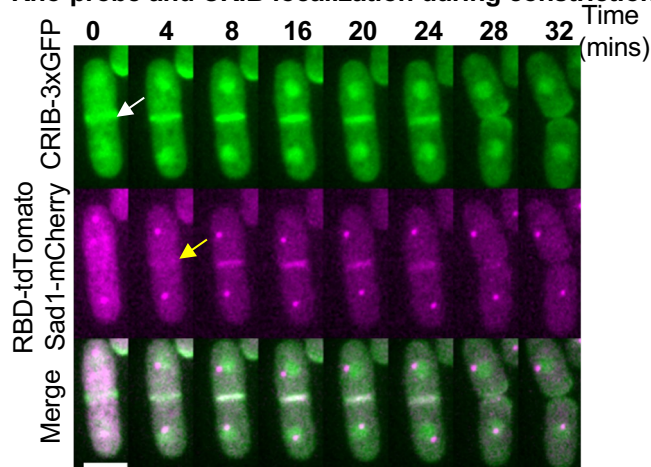

**B**

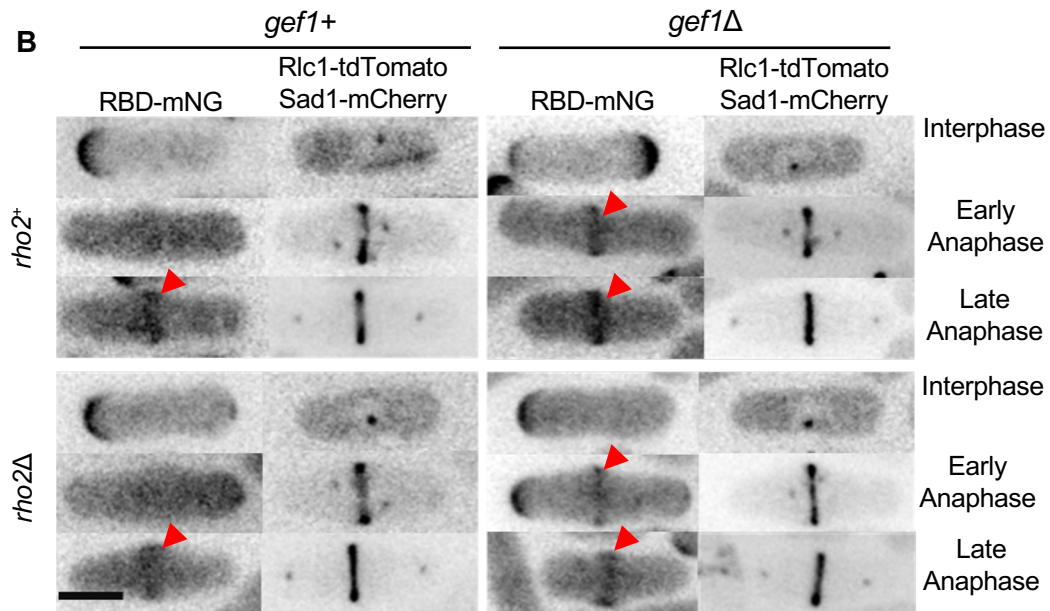

**C Rho1-probe appearance at division site**

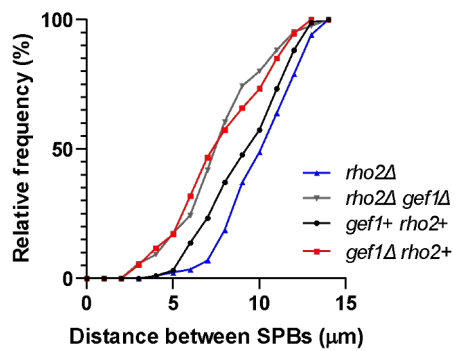

**Fig. S2. Rho-probe, RBD-mNG, detects Rho1 activation in cells**

**A.** Time-lapse montage of a representative cell showing Rho1 (RBD-tdTomato, yellow arrow) and Cdc42 activation (CRIB-3xGFP, white arrow) at the division site during ring constriction. **B.** Sum projection of z-stack images showing active Rho1 (RBD-mNG) in *gef1+* *rho2+* and *gef1Δ* *rho2Δ* strains. Red arrowheads point to active Rho1 localization in dividing cells. **C.** Outcome plot shows the SPB distances at which active Rho1 is observed at the division site in the mentioned strains, n=103 cells per indicated strains. [Scale Bar 5μm]

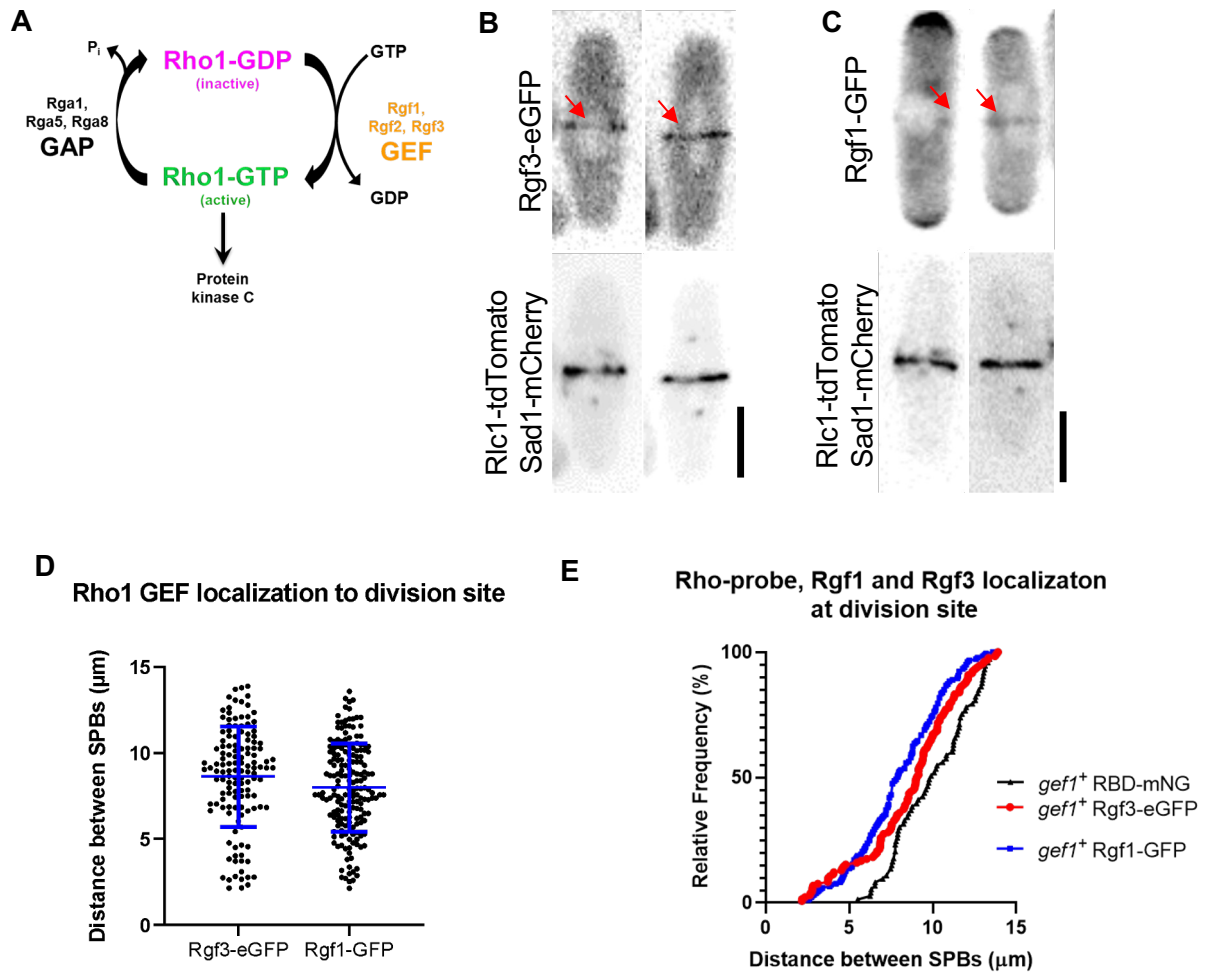

**Fig. S3. Rho1-GEFs Rgf1 and Rgf3 localize to the division site early during cytokinesis**

**A.** A schematic of the Rho1-GTPase activation cycle showing the known GEFs and GAPs. **B.** Localization of Rgf3-mEGFP and **C.** Rgf1-GFP to the division site (Red arrows) [Scale Bar, 5 μm]. **D.** Quantification of the distance between the spindle pole bodies (SPBs) for strains as indicated, [n≥94 cells for each genotype quantified; Error bars represent standard deviation]. **E.** Frequency plot of the shortest SPB distances at which Rgf3 and Rgf1 are present at the division site. Shorter SPB distances represent an earlier time-point during cytokinesis. [n≥90 cells for each genotype quantified].



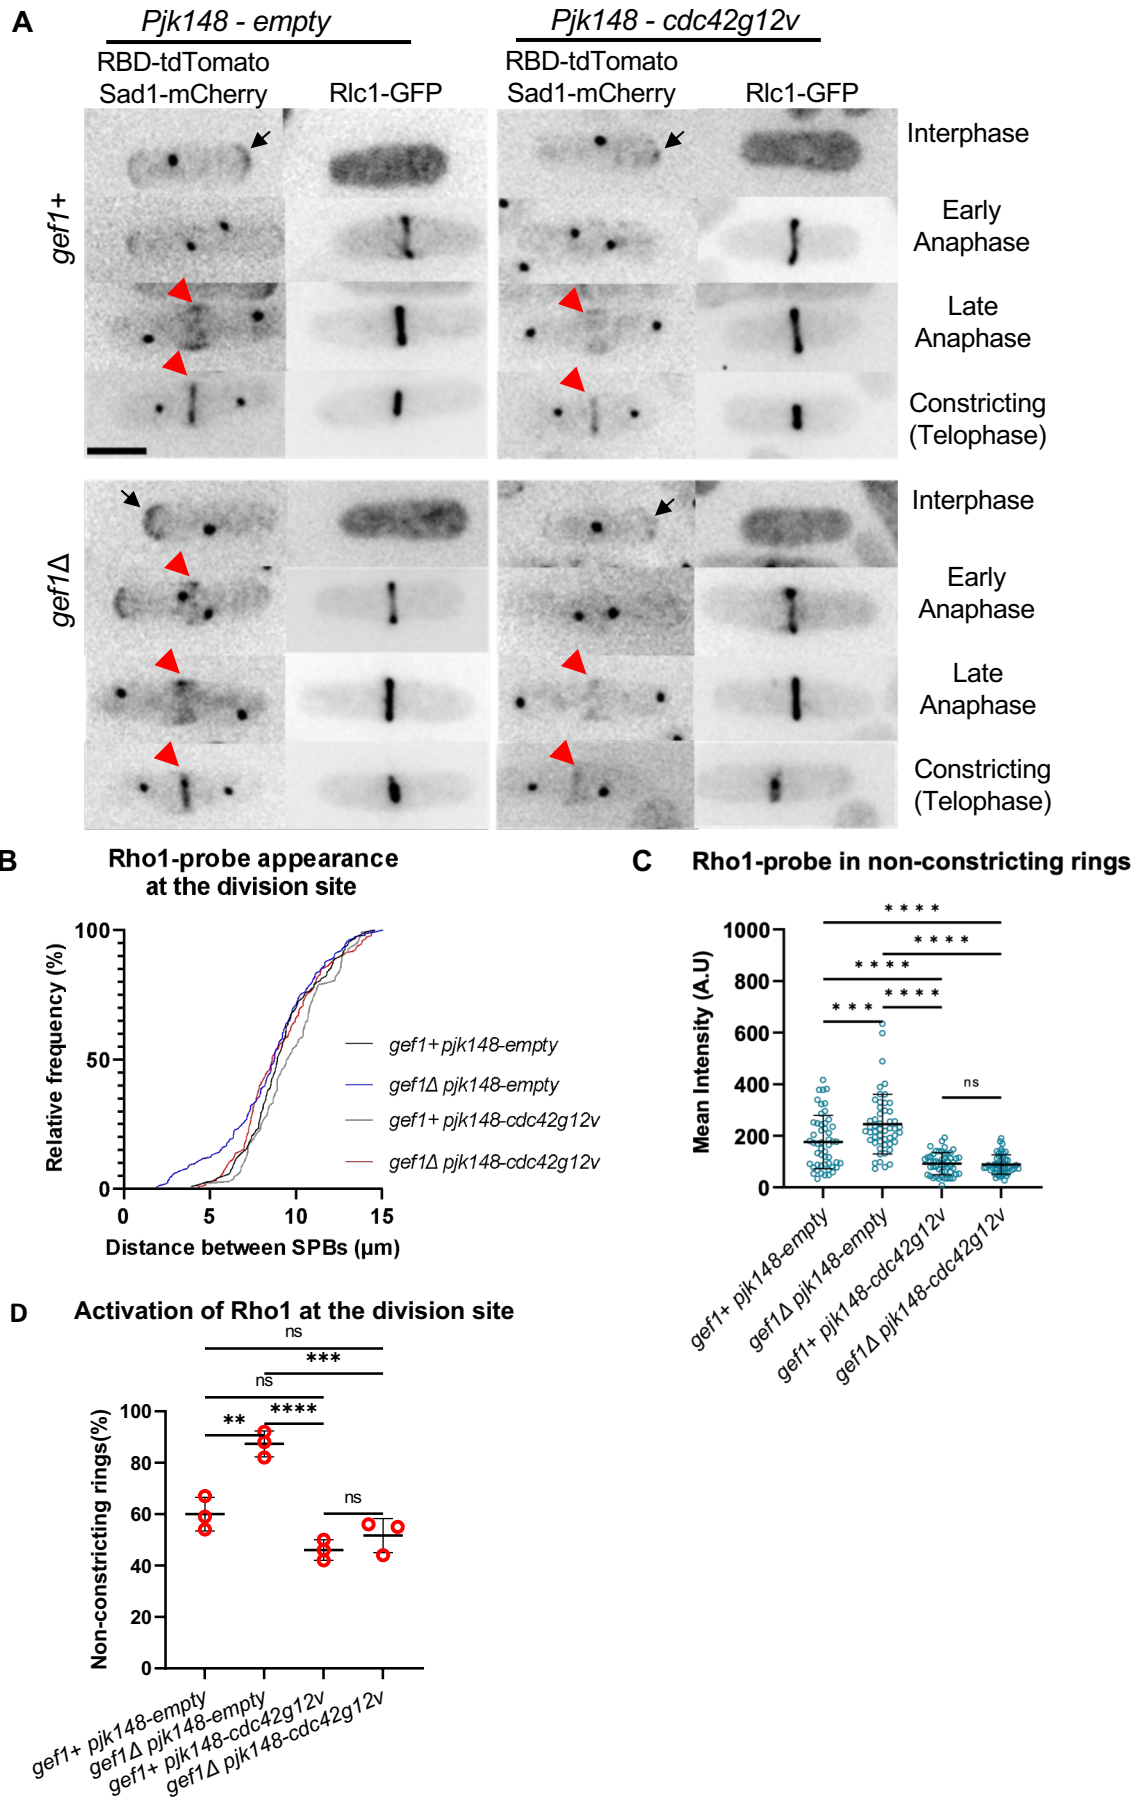

**Fig. S4. Constitutively active *cdc42* mutants rescue early Rho1 activation in *gef1Δ* mutants**

**A.** Rho1 activation (RBD-tdTomato) at the division site (red arrowheads) and cell tips (black arrows) of representative *gef1<sup>+</sup>* and *gef1Δ* cells, transformed with the empty vector pJK148, or expressing constitutively active *cdc42G12V* [Scale Bar, 5μm]. **B.** Outcome plot shows the frequency distribution of SPB distances for which active Rho1 is observed at the division site in the indicated strains, [n=160 cells per strain indicated]. **C.** Quantification of the mean fluorescence intensity of the Rho-probe (RBD-tdTomato) in strains [n≥60 cells per strain]; Statistical significance determined with one-way ANOVA, with Tukey's multiple comparisons post hoc test, \*\*\*p≤0.0002 \*\*\*\*p≤0.0001; n.s - not statistically significant; Error bars represent standard deviation]. **D.** Quantification of the percentage of non-constricting rings in strains as indicated. [N=3 experiments; Statistical significance between strains determined by one-way ANOVA followed by Tukey's HSD test, \*\*p≤0.0016 \*\*\*p≤0.0003, \*\*\*\*p≤0.0001; n.s - not statistically significant; Error bars represent standard deviation.

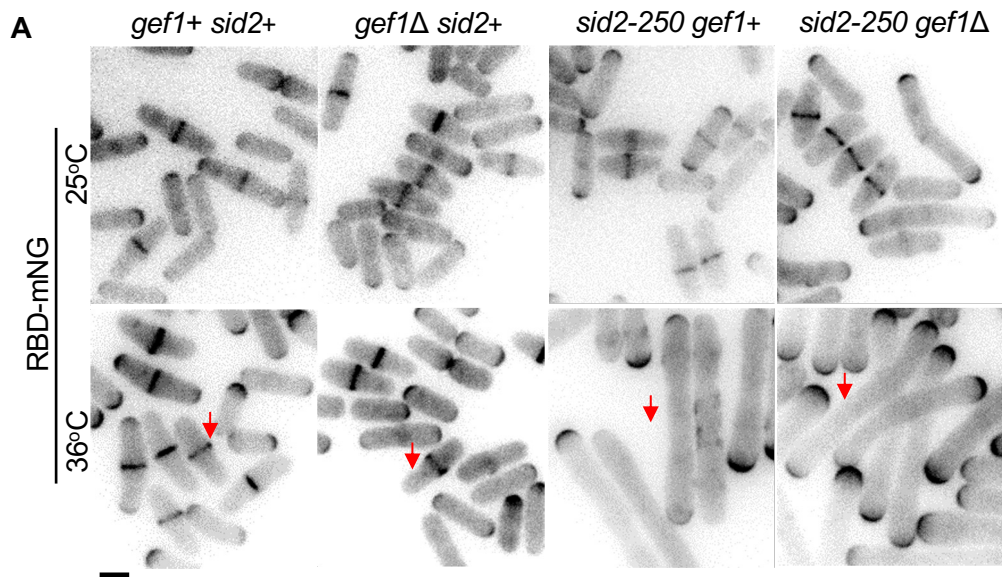

**B** Rho1 activation at division site

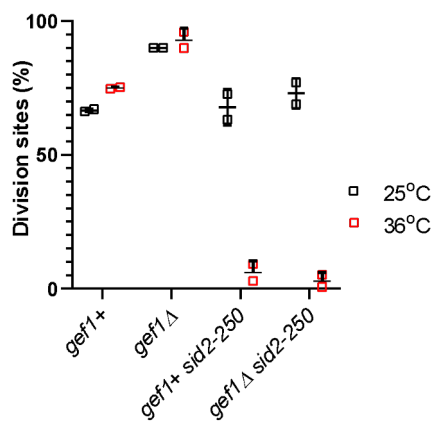

**Fig. S5. The SIN pathway is required for Rho1 activation at the division site**

**A.** Rho1 activation (RBD-mNG) during cytokinesis in *sid2-250* strains incubated for 4 hours at the permissive temperature (25°C) and restrictive temperature (35.5°C) [Scale Bar 5 μm]. Red arrows point to division sites. **B.** Quantification of the fraction of division sites with RBD-mNG localization [N= 2 experiments, (≥100 division sites analyzed per strain for each experiment)]; Error bars represent standard deviation].



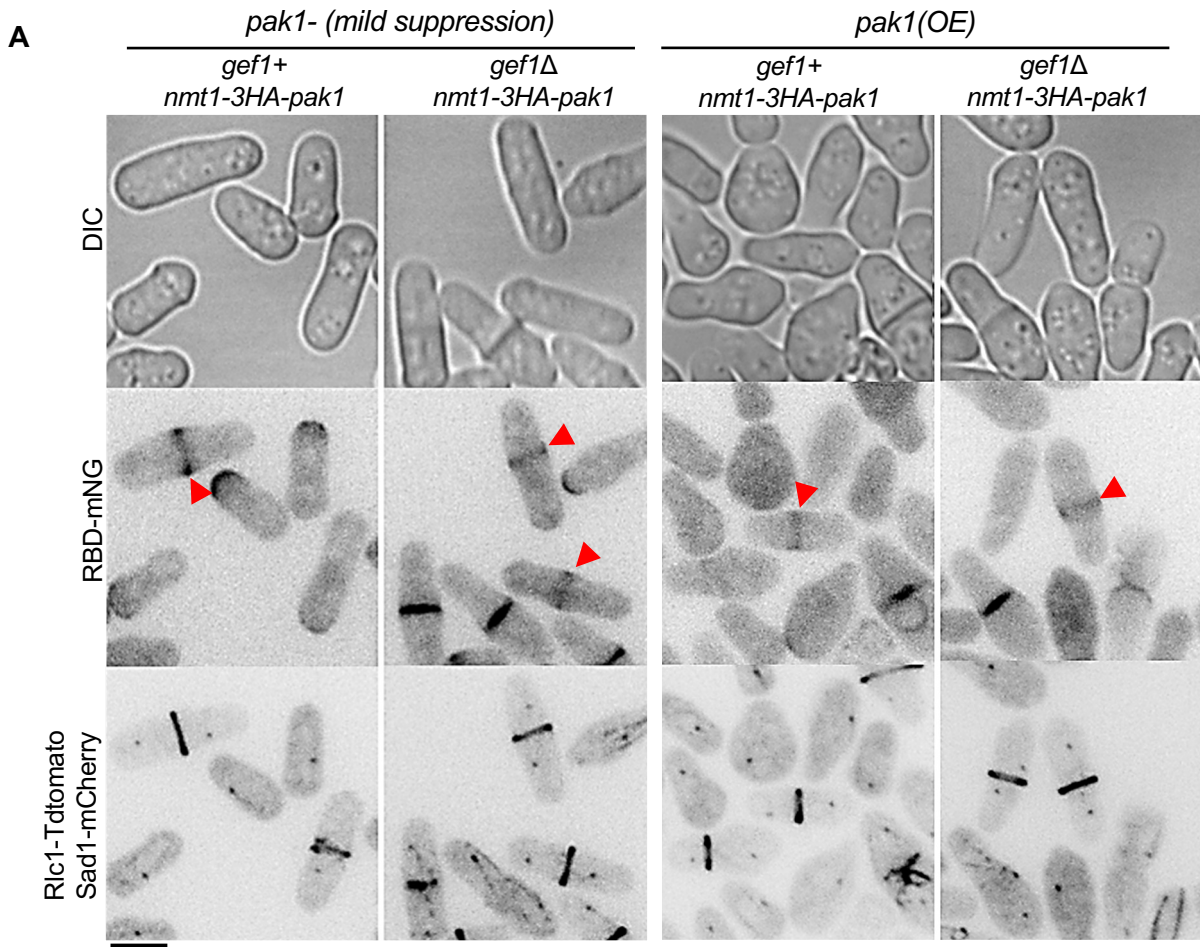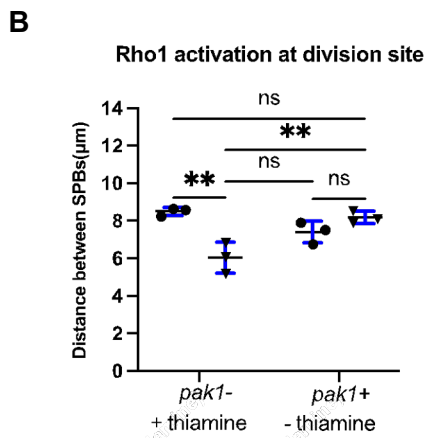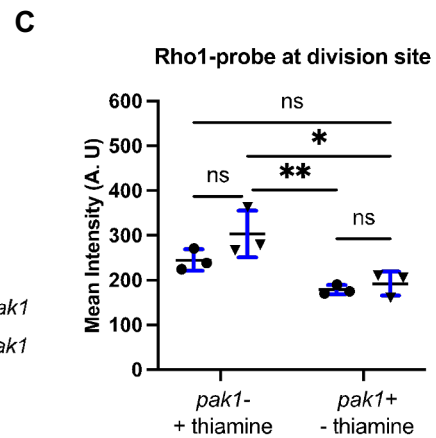

**Fig. S6. Overexpression of *pak1* (*pak1OE*) rescues early Rho1 activation in *gef1Δ* cells**

**A.** Rho1 activation (RBD-mNG) during cytokinesis in *gef1+* and *gef1Δ* cells expressing *nmt1-3HA-pak1*, in thiamine repressing (*pak1-*), or overexpressing (*pak1OE*) conditions (see methods). Red arrowheads point to division sites displaying the active Rho1-probe [Scale Bar 5μm]. **B.** Quantification of the cells with active Rho1-probe at the division site during cytokinesis progression as indicated by the SPB distance. Data points on graph represent first quartile of measurements obtained from N= 3 replicate experiments. [Statistical significance between strains determined by one-way ANOVA followed by Tukey's HSD test, \*\* $p \leq 0.005$ ; n.s - not statistically significant; Error bars represent standard deviation]. **C.** Quantification of the mean fluorescence intensity of active Rho1-probe localized to the division site of indicated strains and conditions. [N= 3 replicate experiments; Statistical significance between strains determined by one-way ANOVA followed by Tukey's HSD test, \* $p \leq 0.01$ , \*\* $p \leq 0.006$ ; n.s- not statistically significant; Error bars represent standard deviation].

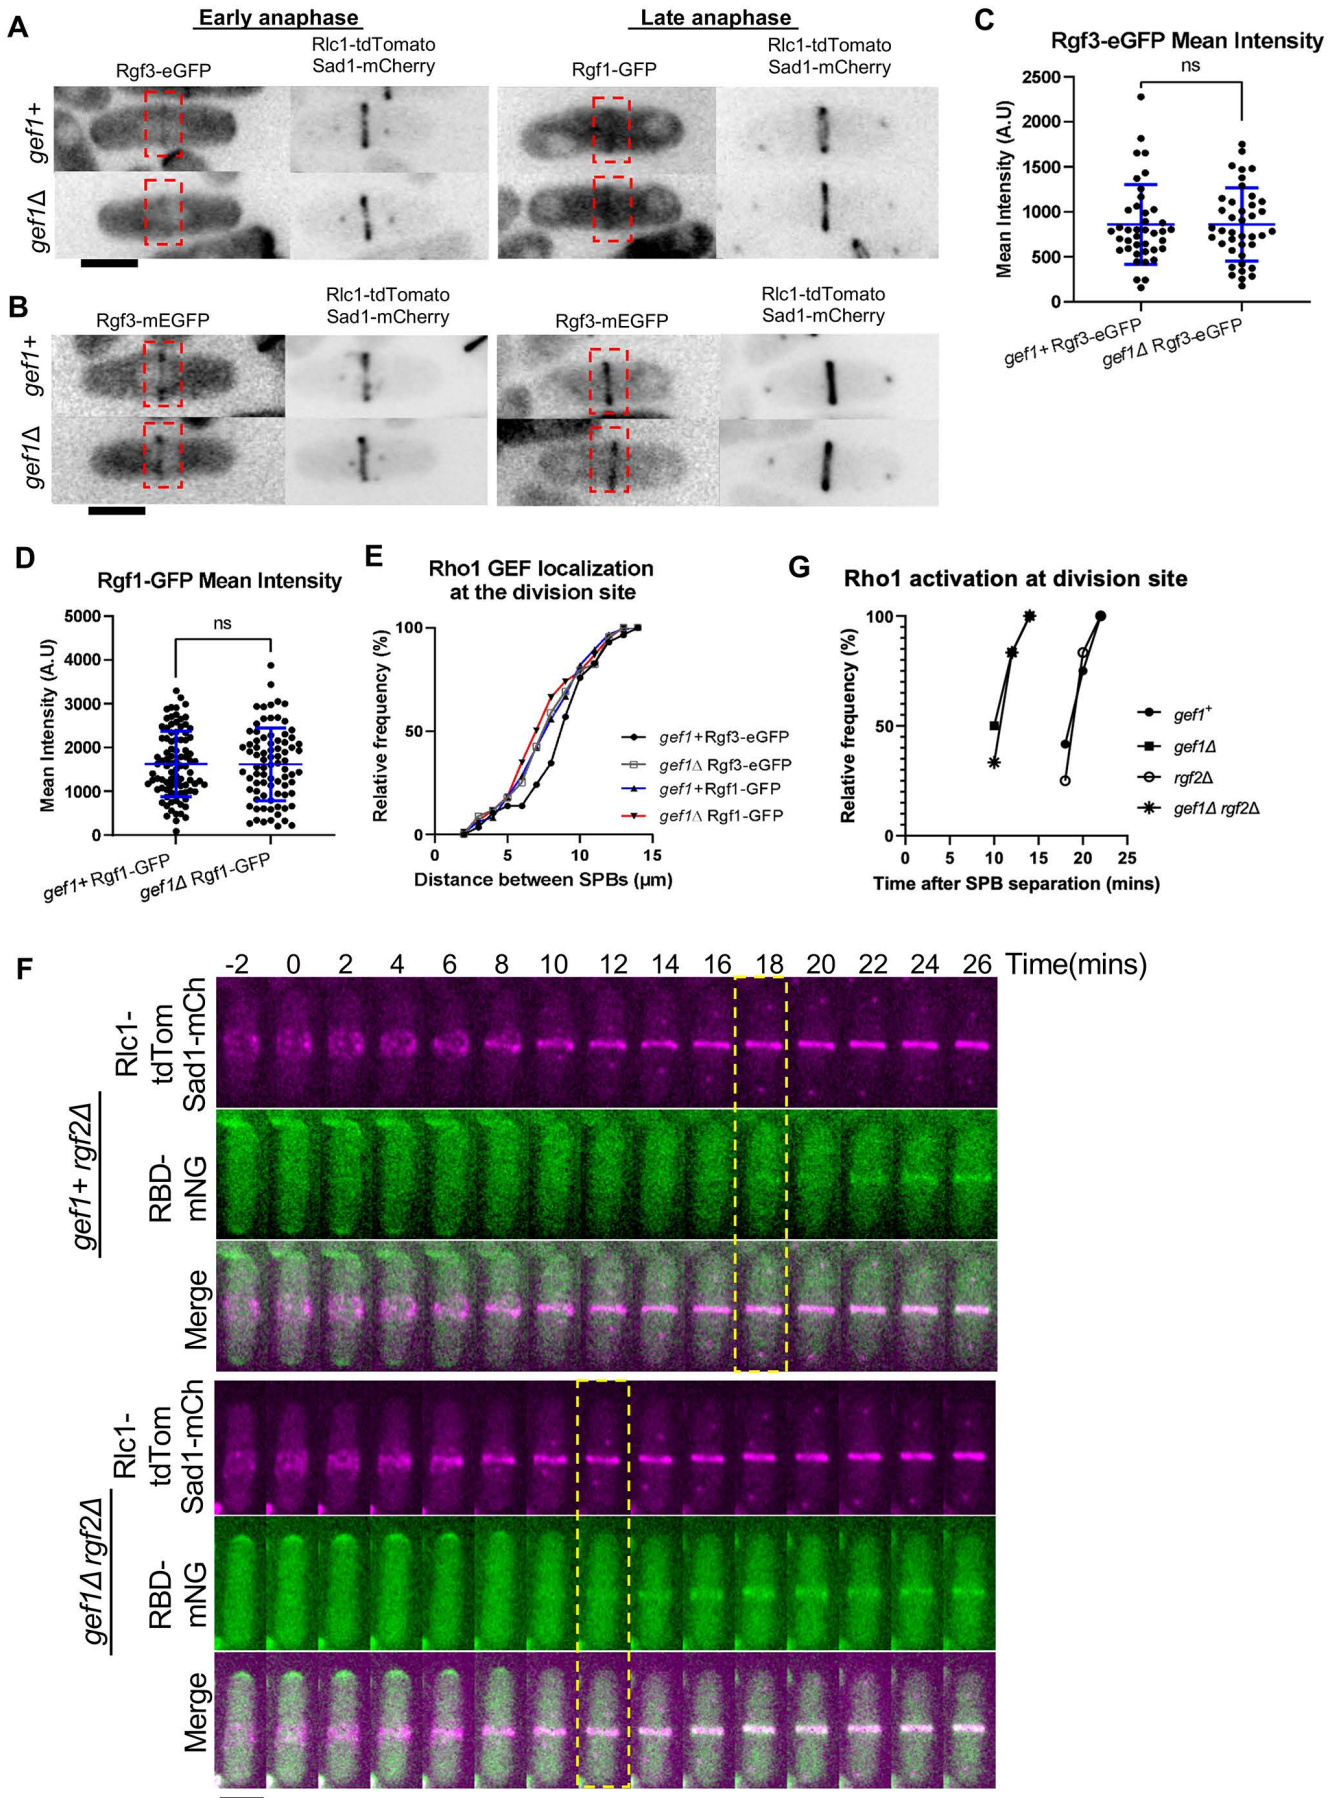

**Fig. S7. Localization of Rho1 GEFs is similar in *gef1+* and *gef1Δ* cells** Sum projections of cells showing localization of Rgf3-eGFP (**A**), and Rgf1-GFP (**B**) to the division site during early and late cytokinesis (red boxes) in the *gef1+* and *gef1Δ* cells. Quantification of mean fluorescent intensities of Rgf3-mE-GFP (**C**), and Rgf1-GFP (**D**), at the division site of indicated strains, [ $n \geq 80$  division sites analyzed per strain; Statistical significance between strains determined by Mann-Whitney test, Rgf3  $p=0.774$ , Rgf1  $p=0.936$ , n.s - not statistically significant; Error bars represent standard deviation]. **E.** Outcome plot shows the distance between the SPBs at which Rgf3 and Rgf1 localization are observed at the division site,  $n \leq 190$  cells per indicated strains. **F.** Loss of *rgf2* does not rescue Rho1 activation in *gef1* mutants. Time-lapse of representative *gef1+* *rgf2+*, and *gef1Δ* *rgf2Δ* cells shows the time of Rho1 activation (RBD-mNG) at the division site during cytokinesis (yellow box) [Scale Bar 5 $\mu$ m] Time=0 marks the time of SPB separation, and onset of cytokinetic events. **G.** Outcome plot shows the frequency of Rho1 activation over time at the division site during cytokinesis [ $n=12$  cells per strain].



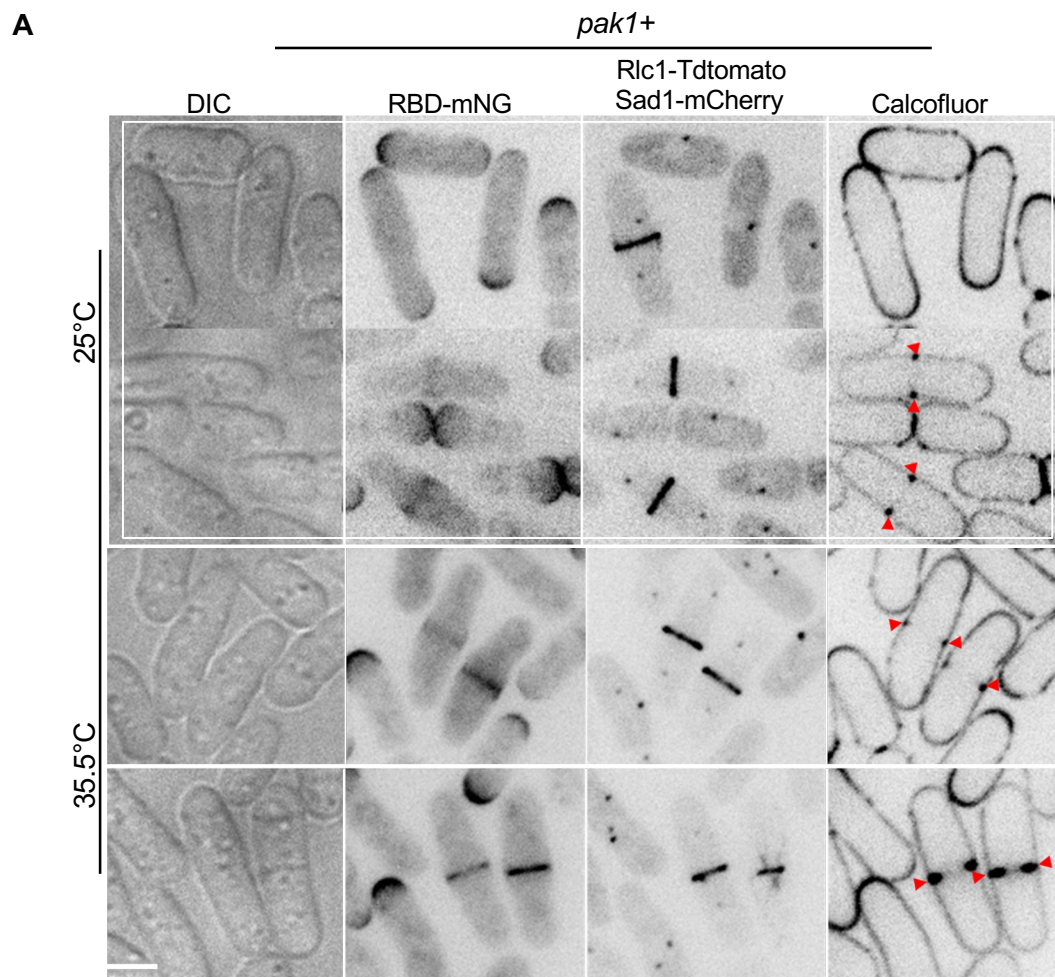

**Fig. S8. Hypomorphic *pak1* mutant show early Rho1 activation in cells during cytokinesis**

**A.** Rho1 activation (RBD-mNG) in *pak1+* (*orb2+*) strains grown at permissive (25°C) and restrictive temperatures (35.5°C). Septum deposition at the division site (red arrowheads) is visualized with calcofluor staining [Scale Bar 5µm].



**Table S1. Strain list**

| <b>Strain</b>   | <b>Genotype</b>                                                                                                | <b>Origin</b>                                        |
|-----------------|----------------------------------------------------------------------------------------------------------------|------------------------------------------------------|
| PN975<br>YMD493 | <i>h+ ura4-D18 leu1-32 ade6-704</i>                                                                            | P. Nurse                                             |
| YMD527          | <i>Rlc1-tdTomato-NATr Sad1-mCherry: kanMx ade6-M21X leu1-32 his7+ ura4-D18</i>                                 | This study                                           |
| YMD1062         | <i>leu2: pck2:RBD-Neon Green leu+ Rlc1-tdTomato-NATr Sad1-mCherry: kanMx</i>                                   | This study                                           |
| YMD 2111        | <i>rho1-596: NatMx6- leu2:pck2:RBD-mNeonGreen:leu+</i>                                                         | This study<br>( <i>rho1-596</i> – Gift from P.Perez) |
| YMD 2113        | <i>rho1::ura4/p41xRho1- leu2: pck2:RBD-Neon Green leu - Rlc1-tdTomato-NATr Sad1-mCherry: kanMx</i>             | This Study<br>( <i>p41xRho1</i> - Gift from P.Perez) |
| YMD1099         | <i>gef1Δ::ura+ leu: pck2:RBD-Neon Green leu+ Rlc1-tdTomato-NATr Sad1-mCherry: kanMx</i>                        | This study                                           |
| YMD1394         | <i>orb2-34 (pak1-ts) leu:pck2:RBD-Neon Green leu+ Rlc1-tdTomato-NATr Sad1-mCherry: kanMx</i>                   | This study                                           |
| YMD1706         | <i>Rgf1-GFP:KanMx Rlc1-tdTomato: NATr Sad1-mCherry:KanMX</i>                                                   | This Study                                           |
| YMD1697         | <i>gef1Δ::ura+ rgf2Δ::KanMx leu2: pck2:RBD-mNeonGreen:leu+ Rlc1-tdTomato-NATr Sad1-mCherry: KanMx</i>          | This Study                                           |
| YMD1729         | <i>rgf2Δ::Kan leu: pck2:RBD-mNeonGreen:leu+ Rlc1-tdTomato-NATr Sad1-mCherry:KanMx</i>                          | This Study                                           |
| YMD1699         | <i>gef1Δ::ura+ rgf1Δ::KanMx leu2: pck2:RBD-mNeonGreen:leu+ Rlc1-tdTomato-NATr Sad1-mCherry: KanMx</i>          | This Study                                           |
| YS733           | <i>h- rgf1Δ::KanMx</i>                                                                                         | Gift from Y.Sanchez                                  |
| YS2147          | <i>h- rgf2Δ::KanMx</i>                                                                                         | Gift from Y.Sanchez                                  |
| PPG0378         | <i>h- rga5Δ::ura+ leu1-32</i>                                                                                  | Gift from P.Perez                                    |
| YMD1728         | <i>rgf1Δ::KanMx leu: pck2:RBD-mNeonGreen:leu+ Rlc1-tdTomato-NATr Sad1-mCherry KanMx</i>                        | This Study                                           |
| YMD1786         | <i>p3-nmt1-3xHA shk1:G418 leu2: pck2:RBD-mNeonGreen:leu+ Rlc1-tdTomato-NATr Sad1-mCherry: KanMx</i>            | This Study                                           |
| YMD1801         | <i>pak2Δ::Kan leu: pck2:RBD-mNeonGreen:leu+ Rlc1-tdTomato-NATr Sad1-mCherry: KanMx</i>                         | This Study                                           |
| YMD1775         | <i>gef1Δ::ura+ p3-nmt1-3xHA shk1:G418 leu: pck2:RBD-mNeonGreen:leu+ Rlc1-tdTomato-NATr Sad1-mCherry: kanMx</i> | This Study                                           |
| VT88            | <i>rgf3Δ(nmt81-rgf3+)</i>                                                                                      | Gift from Y.Sanchez                                  |
| YMD1823         | <i>rgf3Δ(nmt81-rgf3+) leu:pck2:RBD-mNeonGreen:leu+ Rlc1-tdTomato-NATr Sad1-mCherry: kanMx</i>                  | This Study                                           |

|         |                                                                                                          |            |
|---------|----------------------------------------------------------------------------------------------------------|------------|
| YMD1717 | <i>gef1Δ::ura+ rgf3Δ(nmt81-rgf3+) leu:pck2:RBD-mNeonGreen:leu+ Rlc1-tdTomato-NATr Sad1-mCherry:kanMx</i> | This Study |
| YMD1714 | <i>nmt41-cdc42g12v:leu+ RBD-tdTomato:ura+ Rlc1-GFP:Kan Sad1-mCherry:KanMx</i>                            | This Study |
| YMD1715 | <i>gef1Δ::ura+ Rgf1-GFP:Kan Rlc1-tdTomato: NATr Sad1-mCherry:KanMX</i>                                   | This Study |

|                  |                                                                                                              |                  |
|------------------|--------------------------------------------------------------------------------------------------------------|------------------|
| YMD1827          | <i>rho2Δ::ura+ leu:pck2:RBD-mNeonGreen:leu+ Rlc1-tdTomato-NATr Sad1-mCherry: KanMx</i>                       | This Study       |
| YMD1826          | <i>gef1Δ::ura+ rho2Δ::ura+ leu:pck2:RBD-mNeonGreen:leu+ Rlc1-tdTomato-NATr Sad1-mCherry: kanMx</i>           | This Study       |
| YMD1628          | <i>Mob1-mEGFP: KanMx Rlc1-tdTomato: NATr</i>                                                                 | This Study       |
| YMD1629          | <i>Sid2-mEGFP: KanMx Rlc1-tdTomato: NATr</i>                                                                 | This Study       |
| YMD1636          | <i>gef1Δ:ura+ Mob1-mEGFP:KanMx Rlc1-tdTomato:NATr</i>                                                        | This Study       |
| YMD1635          | <i>gef1Δ:ura+ Sid2-GFP:KanMx Rlc1-tdTomato:NATr</i>                                                          | This Study       |
| YMD1632          | <i>h+ gef1Δ:ura+ nmt41-pjk148-empty: leu+ gef1Δ:ura+ RBD-tdTomato:ura+ Rlc1-GFP:KanMx Sad1-mCherry:KanMx</i> | This Study       |
| YMD1602          | <i>nmt41-pjk148-empty: leu+ gef1Δ:ura+ RBD-tdTomato:ura+ Rlc1-GFP:KanMx Sad1-mCherry:KanMx</i>               | This Study       |
| YMD1616          | <i>gef1Δ:ura+ nmt41-cdc42g12v: leu+ gef1Δ::ura+ RBD-tdTomato:ura+ Rlc1-GFP:KanMx Sad1-mCherry:KanMx</i>      | This Study       |
| YMD1045          | <i>leu2:pck2:RBD-mNeonGreen:leu+</i>                                                                         | This Study       |
| YMD1493          | <i>sid2-250 leu2:pck2:RBD-mNeonGreen:leu+ Rlc1-tdTomato-NATr Sad1-mCherry: KanMx</i>                         | This Study       |
| YMD1491          | <i>gef1Δ::ura+ sid2-250 leu:pck2:RBD-mNeonGreen:leu+ Rlc1-tdTomato-NATr Sad1-mCherry: KanMx</i>              | This Study       |
| YMD1119          | <i>Rgf3-mEGFP:leu+ Rlc1-tdTomato: NATr Sad1mCherry:KanMX</i>                                                 | This Study       |
| YMD1121          | <i>gef1Δ::ura+ Rgf3-mEGFP:Kan Rlc1-tdTomato: NATr Sad1-mCherry:KanMX</i>                                     | This Study       |
| YMD764 (MBY3451) | <i>h- nmt1-3xHA-pak1</i>                                                                                     | Loo et al., 2008 |
| YMD1708          | <i>rga5Δ leu:pck2:RBD-mNeonGreen:leu+ Rlc1-tdTomato-NATr Sad1-mCherry: KanMx</i>                             | This Study       |
| YMD1652          | <i>gef1Δ::ura+ rga5Δ:: ura+ leu:pck2:RBD-mNeonGreen:leu+ Rlc1-tdTomato-NATr Sad1-mCherry: KanMx</i>          | This Study       |
